# Supplementary figures and images for: Preparation and Identification of a Monoclonal Antibody against the Pseudorabies Virus gE Glycoprotein through a Novel Strategy
Source: MDPI journal article supplement (doi:10.3390/vetsci10020133), 2023-02-09

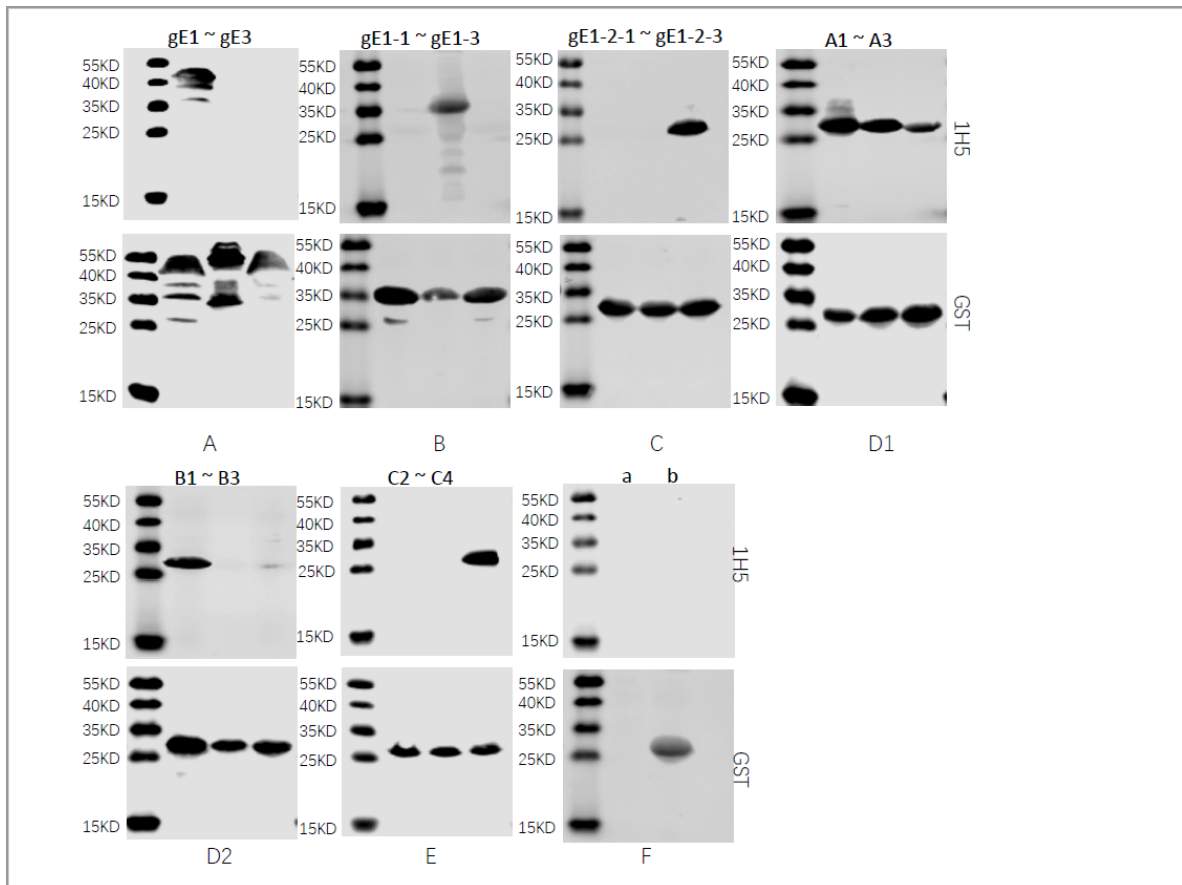

Figure S1: the complete western blot figures.

Supplement: s1 [file s1]
